# Supplementary material for: Time-Course Transcriptomic Profiling of Floral Induction in Cultivated Strawberry
Source: MDPI journal article supplement (doi:10.3390/ijms23116126), 2022-05-30
Supplement: s1 [file s1]

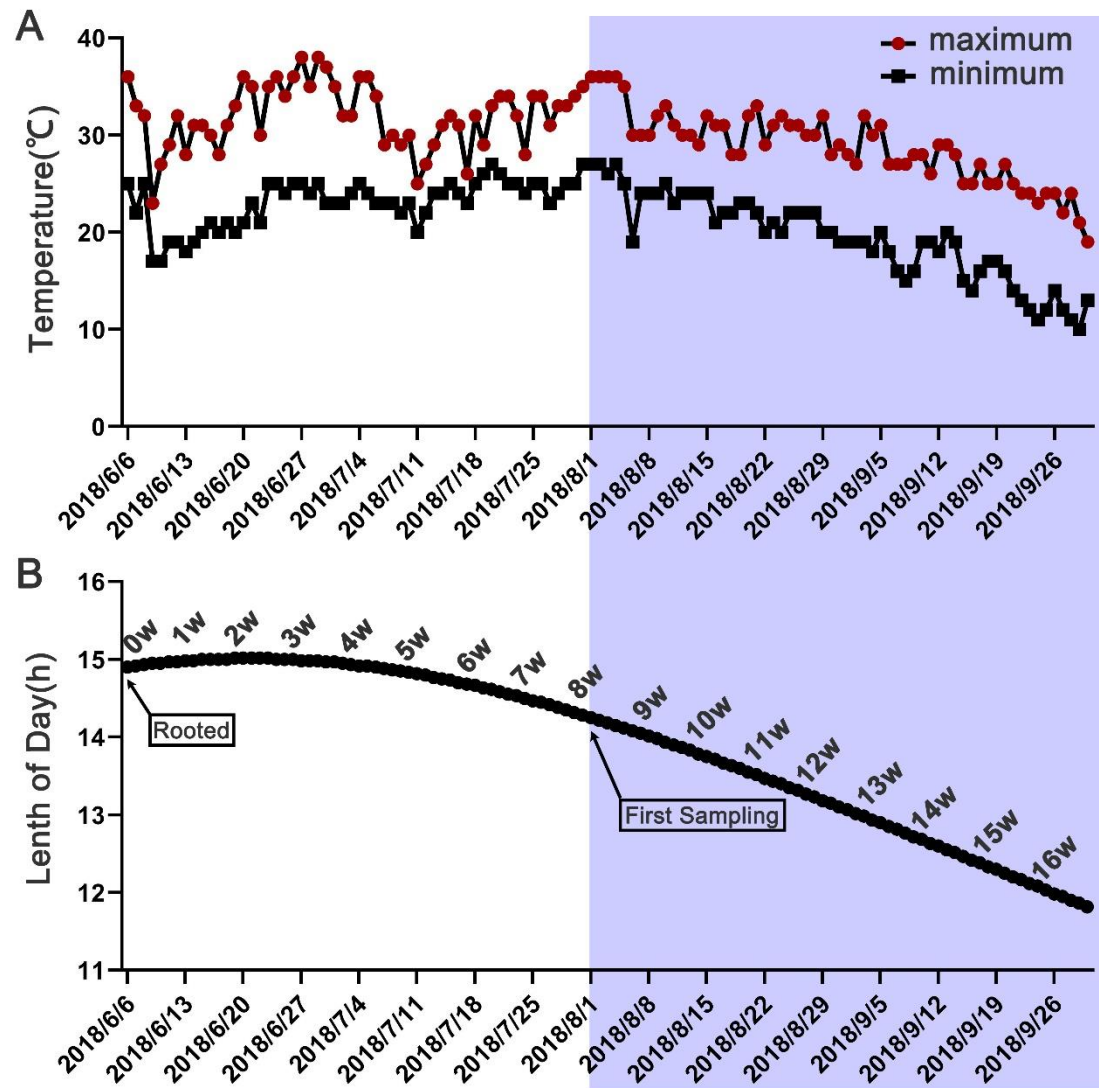

**Figure S1. Temperature and daylight length in Beijing from June to September 2018.** The daughter plants were rooted at 2018/6/6, which is recorded as 0w. The purple square indicates the sampling time interval, and the first time of sampling was at 8w.

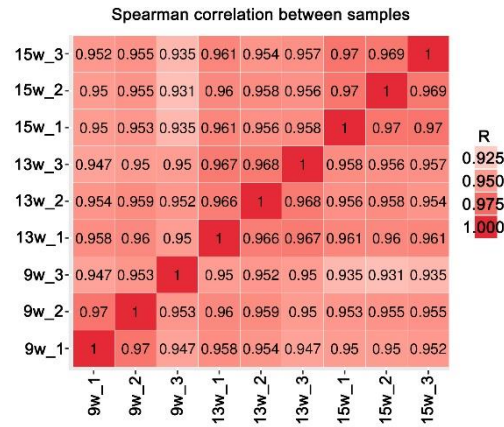

**Figure S2.** Hierarchical cluster diagram of gene expression levels in the nine samples.

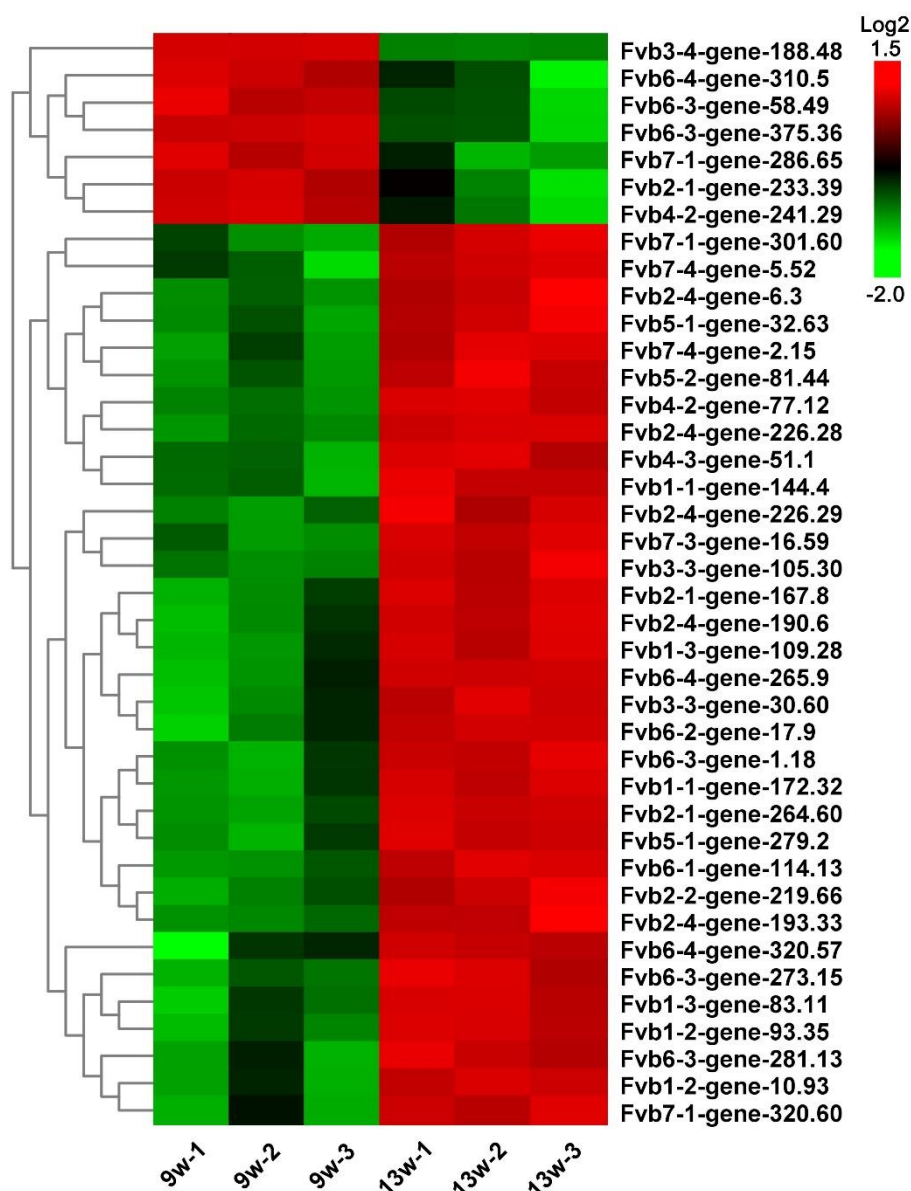

**Figure S3. Heat maps of highly differentially expressed genes ( $|\text{Log2FC}| \geq 2$ ,  $p < 0.001$ ) between 13w and 9w.** The genes are clustered by FPKM value, with red indicating high expression genes and green indicating low expression genes.

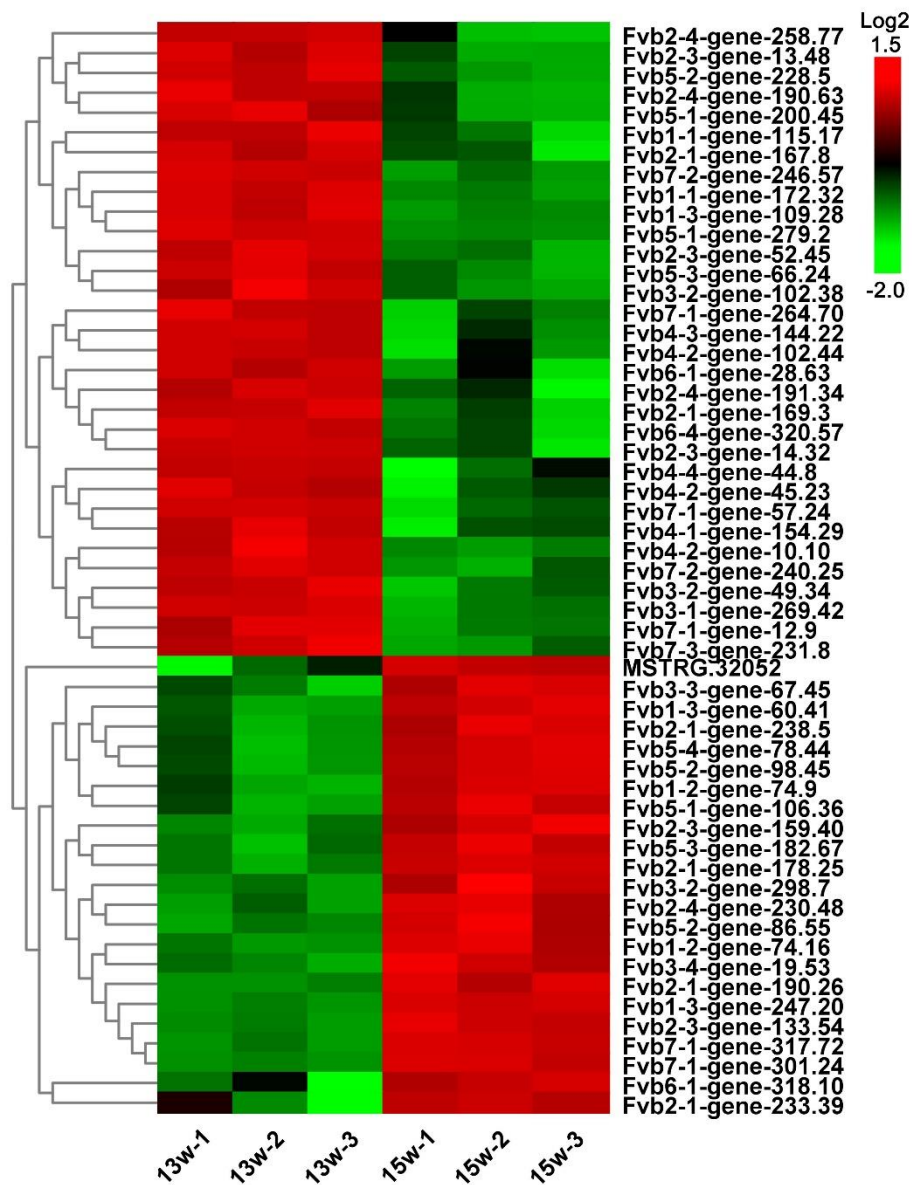

**Figure S4.** Heat maps of highly differentially expressed genes ( $|\text{Log2FC}| \geq 2$ ,  $p < 0.001$ ) between 15 w and 13 w. The genes are clustered by FPKM value, with red indicating high expression genes and green indicating low expression genes.

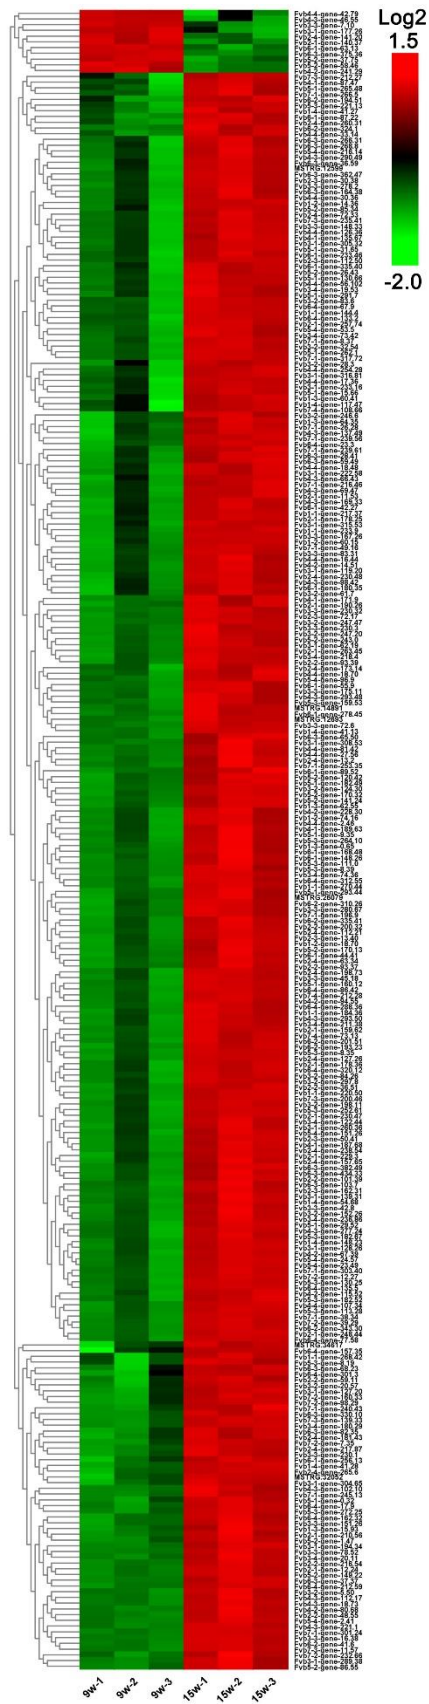

**Figure S5. Heat maps of highly differentially expressed genes ( $|\text{Log2FC}| \geq 2$ ,  $p < 0.001$ ) between 15 w and 9 w.** The genes are clustered by FPKM value, with red indicating high expression genes and green indicating low expression genes.



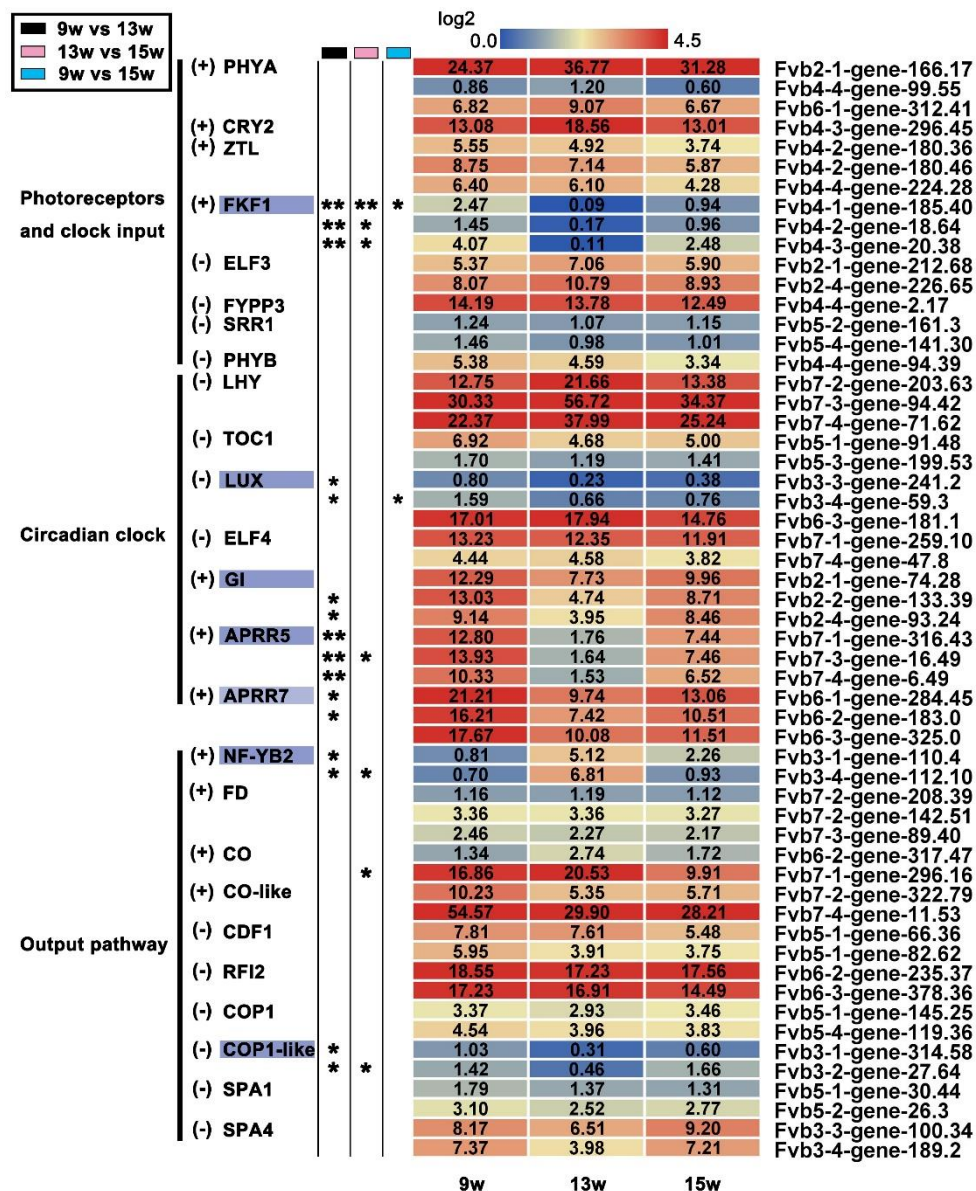

**Figure S6. Heat maps showing the expression of genes involved in the photoperiod flowering pathway.** (+) indicates the positive regulators of flower bud differentiation in Arabidopsis, and (-) indicates negative regulator. The purple boxes indicate the genes in which expression was significantly changed by 9w VS 13w. 9w: vegetative stage, 13w: shifts to reproductive stage at gene level, 15w: reproductive stage. The column with the black boxes represents the student's *t* test analysis of DEGs by 9w VS 13w; The column with the pink boxes represents the student's *t* test analysis of DEGs by 13w VS 15w; The column with the blue boxes represents the student's *t* test analysis of DEGs by 9w VS 15w. (\* |Log2FC| ≥ 1, *p* < 0.05. \*\* |Log2FC| ≥ 2, *p* < 0.01).

**Table S1. Oligonucleotide primers used in this study.**

| Gene ID            | Gene name | Primers                                        |
|--------------------|-----------|------------------------------------------------|
| Fvb7-1-gene-250.12 | Actin     | TGGGTTTGCTGGAGATGAT<br>CAGTTAGGAGAACTGGGTGC    |
| Fvb4-3-gene-20.38  | FKF1      | GCTCTGGAGCCCGATTGTCC<br>GAACCGACAGTTGCGACCGA   |
| Fvb6-2-gene-1.58   | FLC       | TCGTCCGCGTATGAGCAACC<br>CTGGTTCTGCCCTTGGCGAT   |
| Fvb7-3-gene-16.59  | ATX1      | TGCTAGCCACCGTAAGGACCA<br>AGCGAACCCTAGTGAGAGCCT |
| Fvb4-3-gene-14.14  | TSP10     | GCAGCCGAGCATGGCTACTT<br>AGCCATCTGTTCGCCTCGGTA  |
| Fvb7-3-gene-128.14 | SOC1      | CCACGAGCCGTCAAGTCACC<br>ATGAGCGCAACCTCGGCATC   |
| Fvb3-2-gene-161.14 | TFL1      | TGCCGAGGCCAAACATAGGG<br>AAGACAGCAGCCACCGGAAG   |
| Fvb5-1-gene-7.60   | AGL14     | TGCGATGCTGAGGTTGCACT<br>ACCATCACCAAGGAGCTTCCG  |
| Fvb7-3-gene-145.26 | SBP8      | TCTCGACCACTACGCCACCA<br>CGAGGCTGAGCATGGAGTGG   |
| Fvb3-2-gene-130.24 | GH3.6     | CCTTGTGGCTCGTCCAGTCC<br>GCGCCAACTCGGAGGACTAC   |
| Fvb2-2-gene-155.6  | AIP10A5   | ACGGCAGACGGTTCATCGTG<br>GGCTGGTTGGCGAAGCCATA   |
| Fvb7-1-gene-105.29 | SAUR36    | ACGGCGACTTTCACCGTGTT<br>CGGGCACGGTATGGTGATCC   |
| Fvb4-4-gene-22.43  | AHK4      | GAGAGGGAGCCCTCACCCAT<br>GCTCCTCCACGGTTGGGTTT   |
| Fvb4-3-gene-131.37 | ARR1-like | ATGGTGGCAGAGGGACAGGA<br>AGGCTGGACATCCCTTGGGT   |
| Fvb6-4-gene-76.12  | PYL4      | GTGGTCCGCCGCTTCGATAA<br>CAGCACGTCCAGCCTCTCAG   |
| Fvb7-2-gene-286.2  | PP2C51    | TGCCGGGAGAGGTTACACGA<br>CAACCAGCTCCTCCGTCACC   |
| Fvb1-4-gene-10.16  | GAI-like  | CGCTTCCGACGCCGTTATCT<br>ATGGCGTCAGCGAAGTCGAG   |
| Fvb2-4-gene-205.54 | EBF1      | TGTCTCTTGGTCGGCGTGTG<br>TGCACAGGCACTCCTCTCCT   |

---

|                   |            |                      |
|-------------------|------------|----------------------|
| Fvb1-3-gene-53.32 | BZR1-like2 | GCTGAAGCTGGTTGGGTCGT |
|                   |            | AGGACTGTGGGCTTGGTTGC |
| Fvb5-2-gene-57.31 | MYC2-like  | GGCCATTCCAGAGGCACCAG |
|                   |            | TTCCCATGGCCTGCAGCAAA |
| Fvb2-2-gene-218.4 | PR1-like   | GGGTGACGGAGAAGCCCAAC |
|                   |            | GCGCCAAACCACCTGGGTAT |

---
